# Supplementary material for: Suitability and Sensitivity of Golden Grey Mullet Chelon auratus (Risso, 1810) as a Reference Fish Species for Ecotoxicity Tests in the Black Sea
Source: MDPI journal article supplement (doi:10.3390/toxics10050222), 2022-04-28
Supplement: s1 [file s1]

# Supplementary Materials: Suitability and Sensitivity of Golden Grey Mullet *Chelon auratus* (Risso, 1810) as a Reference Fish Species for Ecotoxicity Tests in the Black Sea

Victor Niță, Magda Nenciu and Valentina Coatu

**Table S1.** Dilution series of the test substance (first fill and renewal).

| Flask | First fill                                    |                            |                                         |                                | Renewal                                       |                            |                                         |                                |
|-------|-----------------------------------------------|----------------------------|-----------------------------------------|--------------------------------|-----------------------------------------------|----------------------------|-----------------------------------------|--------------------------------|
|       | Reference toxicant stock solution volume (ml) | Total solution volume (mL) | Reference toxicant concentration (mg/L) | Replicate solution volume (mL) | Reference toxicant stock solution volume (ml) | Total solution volume (mL) | Reference toxicant concentration (mg/L) | Replicate solution volume (mL) |
| C0    | 0                                             | 25,000                     | 0                                       | 5,000                          | 0                                             | 20,000                     | 0                                       | 4,000                          |
| C1    | 5                                             | 25,000                     | 0.2                                     | 5,000                          | 4                                             | 20,000                     | 0.2                                     | 4,000                          |
| C2    | 10                                            | 25,000                     | 0.4                                     | 5,000                          | 8                                             | 20,000                     | 0.4                                     | 4,000                          |
| C3    | 20                                            | 25,000                     | 0.8                                     | 5,000                          | 16                                            | 20,000                     | 0.8                                     | 4,000                          |
| C4    | 40                                            | 25,000                     | 1.6                                     | 5,000                          | 32                                            | 20,000                     | 1.6                                     | 4,000                          |
| C5    | 80                                            | 25,000                     | 3.2                                     | 5,000                          | 64                                            | 20,000                     | 3.2                                     | 4,000                          |

**Table S2. 1-3.** Results of water quality parameter monitoring (temperature pH, salinity, dissolved oxygen and inorganic nitrogen measured at the beginning, before renewal - new - and the end - old - of each 24 h exposure period, for each mixture per concentration).

**Table S2.1. Run 1.**

| Variable                            |                       | Treatments (mg/L) |             |             |             |             |             |
|-------------------------------------|-----------------------|-------------------|-------------|-------------|-------------|-------------|-------------|
|                                     |                       | Control           | 1.25        | 2.5         | 5           | 10          | 20          |
| 0 h<br>Experiment<br>Start<br>(new) | Temperature (°C)      | 21.8±0.52         | 21.28±0.36  | 20.54±0.19  | 20.94±0.90  | 21.5±1.25   | 21.14±1.19  |
|                                     | Salinity (PSU)        | 15.05±0.19        | 15.03±0.09  | 15.29±0.18  | 15.54±0.31  | 15.61±0.49  | 15.62±0.28  |
|                                     | pH                    | 7.88±0.03         | 7.84±0.02   | 7.82±0.02   | 7.79±0.02   | 7.78±0.02   | 7.72±0.01   |
|                                     | D.O. (mg/L)           | 8.71±0.14         | 8.71±0.10   | 8.96±0.09   | 8.78±0.24   | 8.57±0.13   | 8.70±0.08   |
|                                     | Oxygen saturation (%) | 108.36±1.27       | 106.72±1.37 | 108.48±0.43 | 107.94±1.35 | 105.66±0.88 | 107.32±2.15 |
|                                     | NO <sub>2</sub> (μM)  | 0.96              | 0.96        | 0.96        | 0.96        | 0.96        | 0.96        |
|                                     | NO <sub>3</sub> (μM)  | 34.02             | 34.02       | 34.02       | 34.02       | 34.02       | 34.02       |
|                                     | NH <sub>4</sub> (μM)  | 7.52              | 7.52        | 7.52        | 7.52        | 7.52        | 7.52        |
|                                     | Temperature (°C)      | 21.48±0.25        | 22.12±0.31  | 22.04±0.34  | 22.30±0.50  | 22.42±0.36  | 22.62±0.66  |
|                                     | Salinity (PSU)        | 15.13±0.13        | 14.98±0.09  | 15.05±0.17  | 15.05±0.14  | 15.06±0.14  | 15.08±0.23  |
|                                     | pH                    | 7.45±0.08         | 7.49±0.07   | 7.54±0.03   | 7.60±0.04   | 7.65±0.06   | 7.71±0.03   |
|                                     | D.O. (mg/L)           | 2.64±0.87         | 3.87±1.13   | 5.25±0.23   | 6.27±0.48   | 6.21±1.06   | 7.91±0.21   |

|                       |                       |             |             |             |             |             |            |
|-----------------------|-----------------------|-------------|-------------|-------------|-------------|-------------|------------|
| <b>24 h<br/>(old)</b> | Oxygen saturation (%) | 32.62±10.65 | 48.48±14.16 | 65.52±2.62  | 78.66±5.49  | 78.12±13.38 | 99.86±2.04 |
|                       | NO <sub>2</sub> (μM)  | 1.07±0.18   | 0.95±0.05   | 1.17±0.08   | 2.24±1.05   | 3.98±0.31   | 3.38±0.07  |
|                       | NO <sub>3</sub> (μM)  | -           | -           | -           | 18.32±3.04  | 14.68±3.08  | 9.40±1.08  |
|                       | NH <sub>4</sub> (μM)  | 80.61±10.77 | 71.96±4.77  | 73.70±11.80 | 75.41±10.44 | 96.44±18.34 | 74.07±9.81 |
| <b>24 h<br/>(new)</b> | Temperature (°C)      | 20.92±0.36  | 20.94±0.15  | -           | -           | -           | -          |
|                       | Salinity (PSU)        | 15.50±0.37  | 15.46±0.05  | -           | -           | -           | -          |
|                       | pH                    | 7.86±0.03   | 7.83±0.01   | -           | -           | -           | -          |
|                       | D.O. (mg/L)           | 8.44±0.05   | 8.68±0.17   | -           | -           | -           | -          |
|                       | Oxygen saturation (%) | 103.54±1.04 | 106.42±1.77 | -           | -           | -           | -          |
|                       | NO <sub>2</sub> (μM)  | 0.96        | 0.96        | -           | -           | -           | -          |
|                       | NO <sub>3</sub> (μM)  | 34.02       | 34.02       | -           | -           | -           | -          |
|                       | NH <sub>4</sub> (μM)  | 7.52        | 7.52        | -           | -           | -           | -          |
| <b>48 h<br/>(old)</b> | Temperature (°C)      | 20.36±0.34  | 20.40±0.32  | -           | -           | -           | -          |
|                       | Salinity (PSU)        | 15.20±0.04  | 15.17±0.05  | -           | -           | -           | -          |
|                       | pH                    | 7.37±0.04   | 7.41±0.04   | -           | -           | -           | -          |
|                       | D.O. (mg/L)           | 3.17±1.16   | 4.17±1.01   | -           | -           | -           | -          |
|                       | Oxygen saturation (%) | 38.30±14.03 | 50.58±12.13 | -           | -           | -           | -          |
|                       | NO <sub>2</sub> (μM)  | 8.28±2.02   | 4.42±0.74   | -           | -           | -           | -          |
|                       | NO <sub>3</sub> (μM)  | 19.77±2.15  | 19.08±1.66  | -           | -           | -           | -          |
|                       | NH <sub>4</sub> (μM)  | 144.47±3.90 | 143.04±7.15 | -           | -           | -           | -          |
| <b>48 h<br/>(new)</b> | Temperature (°C)      | 20.94±0.13  | 21.04±0.05  | -           | -           | -           | -          |
|                       | Salinity (PSU)        | 15.35±0.11  | 15.41±0.07  | -           | -           | -           | -          |
|                       | pH                    | 7.78±0.02   | 7.77±0.02   | -           | -           | -           | -          |
|                       | D.O. (mg/L)           | 8.68±0.08   | 8.68±0.06   | -           | -           | -           | -          |
|                       | Oxygen saturation (%) | 106.38±0.90 | 106.62±0.86 | -           | -           | -           | -          |
|                       | NO <sub>2</sub> (μM)  | 0.96        | 0.96        | -           | -           | -           | -          |
|                       | NO <sub>3</sub> (μM)  | 34.02       | 34.02       | -           | -           | -           | -          |
|                       | NH <sub>4</sub> (μM)  | 7.52        | 7.52        | -           | -           | -           | -          |
| <b>72 h<br/>(old)</b> | Temperature (°C)      | 20.32±0.23  | 20.76±0.09  | -           | -           | -           | -          |
|                       | Salinity (PSU)        | 15.36±0.05  | 15.34±0.09  | -           | -           | -           | -          |
|                       | pH                    | 7.39±0.04   | 7.41±0.03   | -           | -           | -           | -          |
|                       | D.O. (mg/L)           | 4.49±0.97   | 4.98±0.81   | -           | -           | -           | -          |
|                       | Oxygen saturation (%) | 54.44±11.99 | 60.78±9.87  | -           | -           | -           | -          |
|                       | NO <sub>2</sub> (μM)  | 7.57±1.23   | 6.33±1.59   | -           | -           | -           | -          |
|                       | NO <sub>3</sub> (μM)  | 15.77±2.35  | 15.49±1.89  | -           | -           | -           | -          |
|                       | NH <sub>4</sub> (μM)  | 154.69±2.54 | 162.00±3.72 | -           | -           | -           | -          |
| <b>72 h<br/>(new)</b> | Temperature (°C)      | 20.04±0.26  | 20.22±0.25  | -           | -           | -           | -          |
|                       | Salinity (PSU)        | 15.32±0.07  | 15.35±0.05  | -           | -           | -           | -          |
|                       | pH                    | 7.67±0.24   | 7.77±0.02   | -           | -           | -           | -          |
|                       | D.O. (mg/L)           | 8.87±0.12   | 8.92±0.11   | -           | -           | -           | -          |
|                       | Oxygen saturation (%) | 106.90±1.16 | 107.90±0.93 | -           | -           | -           | -          |
|                       | NO <sub>2</sub> (μM)  | 0.96        | 0.96        | -           | -           | -           | -          |
|                       | NO <sub>3</sub> (μM)  | 34.02       | 34.02       | -           | -           | -           | -          |
|                       | NH <sub>4</sub> (μM)  | 7.52        | 7.52        | -           | -           | -           | -          |
|                       | Temperature (°C)      | 21.46±0.25  | 21.10±0.19  | -           | -           | -           | -          |

|                                                |                       |             |             |   |   |   |   |
|------------------------------------------------|-----------------------|-------------|-------------|---|---|---|---|
| <b>(96 h)<br/>Experiment<br/>end<br/>(old)</b> | Salinity (PSU)        | 15.09±0.06  | 15.06±0.10  | - | - | - | - |
|                                                | pH                    | 7.40±0.05   | 7.40±0.05   | - | - | - | - |
|                                                | D.O. (mg/L)           | 4.59±1.10   | 4.21±0.90   | - | - | - | - |
|                                                | Oxygen saturation (%) | 56.70±13.43 | 51.70±11.00 | - | - | - | - |
|                                                | NO <sub>2</sub> (µM)  | 7.32±2.09   | 2.25±1.02   | - | - | - | - |
|                                                | NO <sub>3</sub> (µM)  | 12.80±3.30  | 11.42±2.11  | - | - | - | - |
|                                                | NH <sub>4</sub> (µM)  | 147.64±6.12 | 151.46±6.70 | - | - | - | - |

Table S2.2. Run 2.

| Variable                                      |                       | Treatments (mg/L) |             |             |             |             |             |
|-----------------------------------------------|-----------------------|-------------------|-------------|-------------|-------------|-------------|-------------|
|                                               |                       | Control           | 0.2         | 0.4         | 0.8         | 1.6         | 3.2         |
| <b>0 h<br/>Experiment<br/>Start<br/>(new)</b> | Temperature (°C)      | 19.5±0.00         | 19.5±0.00   | 19.46±0.09  | 19.64±0.19  | 19.24±0.13  | 19.54±0.11  |
|                                               | Salinity (PSU)        | 15.95±0.11        | 15.97±0.07  | 16.04±0.06  | 15.90±0.08  | 15.92±0.11  | 15.94±0.11  |
|                                               | pH                    | 8.1±0.00          | 8.18±0.02   | 8.14±0.01   | 8.14±0.01   | 8.09±0.00   | 8.14±0.01   |
|                                               | D.O. (mg/L)           | 8.33±0.02         | 8.47±0.07   | 8.41±0.04   | 8.36±0.07   | 8.58±0.09   | 8.52±0.12   |
|                                               | Oxygen saturation (%) | 99.67±0.28        | 101.38±0.82 | 100.62±0.33 | 100.39±0.05 | 102.12±0.97 | 102.01±1.34 |
|                                               | NO <sub>2</sub> (µM)  | 0.19              | 0.19        | 0.19        | 0.19        | 0.19        | 0.19        |
|                                               | NO <sub>3</sub> (µM)  | 3.23              | 3.23        | 3.23        | 3.23        | 3.23        | 3.23        |
|                                               | NH <sub>4</sub> (µM)  | 2.59              | 2.59        | 2.59        | 2.59        | 2.59        | 2.59        |
| <b>24 h<br/>(old)</b>                         | Temperature (°C)      | 20.48±0.24        | 20.7±0.35   | 20.70±0.2   | 20.76±0.15  | 20.70±0.25  | -           |
|                                               | Salinity (PSU)        | 16.10±0.1         | 16.03±0.16  | 15.94±0.08  | 16.02±0.12  | 16.10±0.11  | -           |
|                                               | pH                    | 7.63±0.05         | 7.61±0.02   | 7.57±0.04   | 7.56±0.07   | 7.48±0.10   | -           |
|                                               | D.O. (mg/L)           | 7.26±0.42         | 6.65±0.48   | 6.75±0.39   | 6.69±0.67   | 6.83±0.39   | -           |
|                                               | Oxygen saturation (%) | 88.59±5.18        | 81.47±5.79  | 82.68±4.73  | 81.99±8.19  | 83.71±4.94  | -           |
|                                               | NO <sub>2</sub> (µM)  | 0.3±0.09          | 0.23±0.03   | 0.27±0.02   | 0.26±0.03   | 0.28±0.02   | -           |
|                                               | NO <sub>3</sub> (µM)  | 3.35±0.78         | 2.81±0.23   | 3.10±0.21   | 3.15±0.29   | 3.45±0.67   | -           |
|                                               | NH <sub>4</sub> (µM)  | 21.67±5.19        | 22.54±3.56  | 20.51±2.57  | 23.42±3.76  | 28.09±4.00  | -           |
| <b>24 h<br/>(new)</b>                         | Temperature (°C)      | 19.24±0.21        | 19.36±0.27  | 19.68±0.19  | 19.58±0.41  | 19.50±0.32  | -           |
|                                               | Salinity (PSU)        | 15.92±0.13        | 15.91±0.13  | 15.91±0.2   | 15.96±0.09  | 15.81±0.14  | -           |
|                                               | pH                    | 8.11±0.01         | 8.11±0.03   | 8.07±0.02   | 8.11±0.01   | 8.11±0.01   | -           |
|                                               | D.O. (mg/L)           | 8.80±0.15         | 8.53±0.14   | 8.63±0.08   | 8.34±0.17   | 8.45±0.21   | -           |
|                                               | Oxygen saturation (%) | 104.71±1.35       | 101.79±1.72 | 103.63±0.95 | 100.00±1.50 | 101.07±2.18 | -           |
|                                               | NO <sub>2</sub> (µM)  | 0.19              | 0.19        | 0.19        | 0.19        | 0.19        | -           |
|                                               | NO <sub>3</sub> (µM)  | 3.23              | 3.23        | 3.23        | 3.23        | 3.23        | -           |
|                                               | NH <sub>4</sub> (µM)  | 2.59              | 2.59        | 2.59        | 2.59        | 2.59        | -           |
| <b>48 h<br/>(old)</b>                         | Temperature (°C)      | 20.20±0.16        | 20.58±0.13  | 20.26±0.21  | 20.34±0.15  | 20.66±0.19  | -           |
|                                               | Salinity (psu)        | 15.94±0.06        | 15.99±0.09  | 16.02±0.14  | 16.00±0.10  | 16.17±0.11  | -           |
|                                               | pH                    | 7.22±0.04         | 7.18±0.03   | 7.20±0.04   | 7.18±0.01   | 7.16±0.04   | -           |
|                                               | D.O. (mg/L)           | 7.73±0.16         | 6.93±1.01   | 7.49±0.36   | 7.29±0.12   | 7.06±0.41   | -           |
|                                               | Oxygen saturation (%) | 93.78±2.01        | 84.73±12.21 | 90.97±4.41  | 88.69±1.41  | 86.48±4.98  | -           |
|                                               | NO <sub>2</sub> (µM)  | 0.22±0.02         | 0.21±0.01   | 0.20±0.01   | 0.05±0.02   | 0.22±0.04   | -           |
|                                               | NO <sub>3</sub> (µM)  | 2.02±0.14         | 2.17±0.16   | 2.15±0.32   | 2.22±0.2    | 2.08±0.09   | -           |
|                                               | NH <sub>4</sub> (µM)  | 24.23±3.52        | 25.24±4.34  | 21.00±3.16  | 31.16±5.27  | 37.86±5.47  | -           |

|                                     |                       |             |             |             |             |             |   |
|-------------------------------------|-----------------------|-------------|-------------|-------------|-------------|-------------|---|
| <b>48 h<br/>(new)</b>               | Temperature (°C)      | 19.44±0.24  | 19.66±0.29  | 19.10±0.35  | 19.38±0.46  | 17.20±0.2   | - |
|                                     | Salinity (PSU)        | 15.97±0.06  | 15.97±0.04  | 15.92±0.08  | 15.96±0.13  | 13.82±0.04  | - |
|                                     | pH                    | 7.58±0.04   | 7.59±0.04   | 7.57±0.02   | 7.56±0.01   | 6.69±0.02   | - |
|                                     | D.O. (mg/L)           | 8.48±0.07   | 8.32±0.08   | 8.49±0.04   | 8.44±0.14   | 6.83±0.05   | - |
|                                     | Oxygen saturation (%) | 101.34±0.83 | 99.86±0.43  | 100.83±0.26 | 100.72±0.79 | 82.00±8.38  | - |
|                                     | NO <sub>2</sub> (μM)  | 0.19        | 0.19        | 0.19        | 0.19        | 0.19        | - |
|                                     | NO <sub>3</sub> (μM)  | 3.23        | 3.23        | 3.23        | 3.23        | 3.23        | - |
|                                     | NH <sub>4</sub> (μM)  | 2.59        | 2.59        | 2.59        | 2.59        | 2.59        | - |
| <b>72 h<br/>(old)</b>               | Temperature (°C)      | 20.72±0.27  | 20.9±0.17   | 20.80±0.33  | 20.76±0.05  | 21.27±0.23  | - |
|                                     | Salinity (PSU)        | 15.71±0.17  | 15.73±0.14  | 15.63±0.13  | 15.67±0.06  | 15.70±0.14  | - |
|                                     | pH                    | 7.24±0.03   | 7.23±0.03   | 7.21±0.02   | 7.21±0.03   | 7.20±0.06   | - |
|                                     | D.O. (mg/L)           | 7.36±0.43   | 7.26±0.19   | 7.25±0.22   | 7.12±0.28   | 6.80±0.86   | - |
|                                     | Oxygen saturation (%) | 90.01±5.08  | 89.07±2.16  | 88.80±2.30  | 87.15±3.43  | 83.99±10.38 | - |
|                                     | NO <sub>2</sub> (μM)  | 0.12±0.02   | 0.12±0.01   | 0.10±0.00   | 0.09±0.01   | 0.08±0.02   | - |
|                                     | NO <sub>3</sub> (μM)  | 2.53±0.06   | 2.62±0.19   | 2.74±0.08   | 2.67±0.23   | 2.87±0.16   | - |
|                                     | NH <sub>4</sub> (μM)  | 27.56±4.01  | 28.78±4.22  | 25.53±3.69  | 31.52±4.16  | 35.07±3.33  | - |
| <b>72 h<br/>(new)</b>               | Temperature (°C)      | 19.50±0.18  | 19.86±0.19  | 19.66±0.05  | 19.78±0.40  | 19.52±0.15  | - |
|                                     | Salinity (PSU)        | 15.44±0.26  | 15.51±0.06  | 15.52±0.06  | 15.52±0.15  | 15.58±0.12  | - |
|                                     | pH                    | 7.52±0.01   | 7.51±0.01   | 7.49±0.01   | 7.46±0.00   | 7.45±0.01   | - |
|                                     | D.O. (mg/L)           | 8.34±0.03   | 8.20±0.06   | 8.25±0.05   | 8.21±0.10   | 8.28±0.06   | - |
|                                     | Oxygen saturation (%) | 99.55±0.27  | 98.56±0.69  | 98.74±0.49  | 98.53±0.46  | 98.96±0.46  | - |
|                                     | NO <sub>2</sub> (μM)  | 0.19        | 0.19        | 0.19        | 0.19        | 0.19        | - |
|                                     | NO <sub>3</sub> (μM)  | 3.23        | 3.23        | 3.23        | 3.23        | 3.23        | - |
|                                     | NH <sub>4</sub> (μM)  | 2.59        | 2.59        | 2.59        | 2.59        | 2.59        | - |
| <b>Experiment<br/>end<br/>(old)</b> | Temperature (°C)      | 20.56±0.11  | 21.06±0.42  | 21.22±0.16  | 21.52±0.31  | 21.54±0.30  | - |
|                                     | Salinity (PSU)        | 16.13±0.15  | 16.09±0.15  | 16.17±0.14  | 16.10±0.09  | 16.25±0.17  | - |
|                                     | pH                    | 7.28±0.08   | 7.12±0.15   | 7.22±0.22   | 7.13±0.10   | 7.22±0.09   | - |
|                                     | D.O. (mg/L)           | 7.31±0.48   | 4.24±2.59   | 6.42±1.01   | 5.87±1.27   | 6.63±1.15   | - |
|                                     | Oxygen saturation (%) | 89.40±5.90  | 52.46±32.27 | 79.55±12.57 | 73.06±15.58 | 82.59±14.36 | - |
|                                     | NO <sub>2</sub> (μM)  | 0.17±0.02   | 0.15±0.02   | 0.16±0.03   | 0.14±0.01   | 0.14±0.02   | - |
|                                     | NO <sub>3</sub> (μM)  | 2.07±0.15   | 2.23±0.13   | 2.31±0.46   | 1.93±0.21   | 2.06±0.15   | - |
|                                     | NH <sub>4</sub> (μM)  | 25.11±6.27  | 30.61±5.38  | 27.21±3.51  | 33.02±4.52  | 32.99±5.88  | - |

Table S2.3. Run 3.

|                                     |                       | Treatments (mg/L) |            |            |             |             |            |
|-------------------------------------|-----------------------|-------------------|------------|------------|-------------|-------------|------------|
| Variable                            |                       | Control           | 0.2        | 0.4        | 0.8         | 1.6         | 3.2        |
| 0 h<br>Experiment<br>Start<br>(new) | Temperature (°C)      | 21.18±0.04        | 21.10±0.00 | 21.00±0.0  | 20.90±0.17  | 20.86±0.09  | 20.78±0.04 |
|                                     | Salinity (PSU)        | 15.96±0.05        | 16.10±0.19 | 16.08±0.20 | 16.03±0.19  | 15.98±0.19  | 16.00±0.13 |
|                                     | pH                    | 7.78±0.02         | 7.79±0.02  | 7.74±0.02  | 7.66±0.01   | 7.62±0.02   | 7.56±0.01  |
|                                     | D.O. (mg/L)           | 8.65±0.03         | 8.76±0.0   | 8.74±0.08  | 8.67±0.05   | 8.60±0.03   | 8.63±0.07  |
|                                     | Oxygen saturation (%) | 97.32±0.38        | 98.38±0.92 | 98.09±0.82 | 97.15±0.21  | 96.24±0.21  | 96.33±0.74 |
|                                     | NO <sub>2</sub> (µM)  | 0.29              | 0.29       | 0.29       | 0.29        | 0.29        | 0.29       |
|                                     | NO <sub>3</sub> (µM)  | 12.44             | 12.44      | 12.44      | 12.44       | 12.44       | 12.44      |
|                                     | NH <sub>4</sub> (µM)  | 0.92              | 0.92       | 0.92       | 0.92        | 0.92        | 0.92       |
| 24 h<br>(old)                       | Temperature (°C)      | 19.50±0.19        | 19.56±0.21 | 19.54±0.21 | 19.40±0.16  | 19.52±0.11  | 19.64±0.28 |
|                                     | Salinity (PSU)        | 16.34±0.10        | 16.36±0.15 | 16.39±0.12 | 16.43±0.09  | 16.37±0.03  | 16.41±0.15 |
|                                     | pH                    | 7.32±0.04         | 7.33±0.04  | 7.30±0.05  | 7.30±0.04   | 7.30±0.02   | 7.28±0.13  |
|                                     | D.O. (mg/L)           | 8.50±0.07         | 8.41±0.17  | 8.32±0.23  | 8.51±0.13   | 8.34±0.22   | 8.20±0.36  |
|                                     | Oxygen saturation (%) | 92.57±0.96        | 91.74±1.74 | 90.69±2.34 | 92.52±1.22  | 90.93±2.33  | 89.49±3.66 |
|                                     | NO <sub>2</sub> (µM)  | 0.20±0.01         | 0.21±0.03  | 0.22±0.01  | 0.25±0.03   | 0.26±0.02   | 0.61±0.11  |
|                                     | NO <sub>3</sub> (µM)  | 13.62±0.52        | 14.72±0.78 | 14.64±0.71 | 14.67±0.68  | 15.65±0.61  | 19.73±0.12 |
|                                     | NH <sub>4</sub> (µM)  | 6.83±0.60         | 6.85±1.56  | 8.92±1.22  | 8.33±0.81   | 10.82±1.12  | 11.83±2.31 |
| 24 h<br>(new)                       | Temperature (°C)      | 19.66±0.09        | 20.14±0.05 | 20.20±0.07 | 20.18±0.04  | 20.22±0.04  | -          |
|                                     | Salinity (PSU)        | 16.38±0.09        | 16.48±0.03 | 16.46±0.08 | 16.42±0.02  | 16.47±0.06  | -          |
|                                     | pH                    | 7.53±0.01         | 7.64±0.02  | 7.58±0.01  | 7.56±0.02   | 7.52±0.01   | -          |
|                                     | D.O. (mg/L)           | 8.49±0.04         | 8.91±0.12  | 8.82±0.09  | 8.74±0.03   | 8.73±0.08   | -          |
|                                     | Oxygen saturation (%) | 92.77±0.42        | 98.21±1.34 | 97.37±0.89 | 96.49±0.24  | 96.38±0.81  | -          |
|                                     | NO <sub>2</sub> (µM)  | 0.29              | 0.29       | 0.29       | 0.29        | 0.29        | -          |
|                                     | NO <sub>3</sub> (µM)  | 12.44             | 12.44      | 12.44      | 12.44       | 12.44       | -          |
|                                     | NH <sub>4</sub> (µM)  | 0.92              | 0.92       | 0.92       | 0.92        | 0.92        | -          |
| 48 h<br>(old)                       | Temperature (°C)      | 19.38±0.24        | 19.24±0.15 | 19.30±0.14 | 19.2±0.19   | 19.48±0.19  | -          |
|                                     | Salinity (PSU)        | 16.30±0.10        | 16.33±0.07 | 16.43±0.11 | 16.37±0.06  | 16.26±0.10  | -          |
|                                     | pH                    | 7.30±0.03         | 7.29±0.02  | 7.26±0.01  | 7.25±0.03   | 7.26±0.02   | -          |
|                                     | D.O. (mg/L)           | 8.88±0.13         | 8.81±0.25  | 8.87±0.10  | 8.86±0.13   | 8.81±0.19   | -          |
|                                     | Oxygen saturation (%) | 96.48±1.20        | 95.47±2.79 | 96.20±0.78 | 105.68±1.15 | 105.53±2.03 | -          |
|                                     | NO <sub>2</sub> (µM)  | 0.25±0.04         | 0.25±0.05  | 0.24±0.02  | 0.25±0.02   | 0.27±0.03   | -          |
|                                     | NO <sub>3</sub> (µM)  | 13.09±0.33        | 13.30±1.14 | 12.76±0.99 | 13.31±0.62  | 13.52±1.05  | -          |
|                                     | NH <sub>4</sub> (µM)  | 6.47±1.01         | 8.25±0.85  | 9.76±0.79  | 9.83±1.25   | 13.83±2.69  | -          |

|                                     |                       |             |             |             |             |             |   |
|-------------------------------------|-----------------------|-------------|-------------|-------------|-------------|-------------|---|
| <b>48 h<br/>(new)</b>               | Temperature (°C)      | 19.74±0.05  | 20±0.07     | 20±0.07     | 20.08±0.04  | 20.08±0.04  | - |
|                                     | Salinity (PSU)        | 16.37±0.09  | 16.41±0.07  | 16.42±0.06  | 16.41±0.10  | 16.39±0.10  | - |
|                                     | pH                    | 7.41±0.01   | 7.46±0.01   | 7.43±0.02   | 7.41±0.01   | 7.38±0.01   | - |
|                                     | D.O. (mg/L)           | 8.38±0.03   | 8.96±0.11   | 8.85±0.05   | 8.85±0.10   | 8.78±0.09   | - |
|                                     | Oxygen saturation (%) | 91.69±0.38  | 98.61±0.93  | 107.22±0.60 | 107.40±1.20 | 106.60±0.98 | - |
|                                     | NO <sub>2</sub> (µM)  | 0.29        | 0.29        | 0.29        | 0.29        | 0.29        | - |
|                                     | NO <sub>3</sub> (µM)  | 12.44       | 12.44       | 12.44       | 12.44       | 12.44       | - |
|                                     | NH <sub>4</sub> (µM)  | 0.92        | 0.92        | 0.92        | 0.92        | 0.92        | - |
| <b>72 h<br/>(old)</b>               | Temperature (°C)      | 19.4±0.27   | 19.18±0.08  | 19.24±0.19  | 19.32±0.23  | 19.70±0.28  | - |
|                                     | Salinity (PSU)        | 16.32±0.10  | 16.30±0.10  | 16.31±0.15  | 16.43±0.19  | 16.39±0.04  | - |
|                                     | pH                    | 7.25±0.03   | 7.26±0.01   | 7.23±0.02   | 7.22±0.02   | 7.23±0.03   | - |
|                                     | D.O. (mg/L)           | 8.71±0.12   | 8.70±0.21   | 8.54±0.29   | 8.65±0.34   | 8.80±0.15   | - |
|                                     | Oxygen saturation (%) | 104.31±0.93 | 103.72±2.46 | 101.88±3.37 | 103.45±3.52 | 106.03±2.28 | - |
|                                     | NO <sub>2</sub> (µM)  | 0.22±0.02   | 0.23±0.04   | 0.46±0.05   | 0.62±0.07   | 0.28±0.14   | - |
|                                     | NO <sub>3</sub> (µM)  | 10.49±1.03  | 11.49±0.61  | 10.30±0.51  | 10.67±0.42  | 8.52±4.54   | - |
|                                     | NH <sub>4</sub> (µM)  | 7.00±0.98   | 7.98±0.80   | 9.88±0.57   | 9.83±0.36   | 7.47±4.30   | - |
| <b>72 h<br/>(new)</b>               | Temperature (°C)      | 19.68±0.08  | 20.06 ±0.05 | 20.08±0.04  | 20.08±0.04  | 20.03 ±0.12 | - |
|                                     | Salinity (PSU)        | 16.34±0.05  | 16.40 ±0.09 | 16.40±0.09  | 16.40±0.06  | 16.45±0.08  | - |
|                                     | pH                    | 7.34±0.01   | 7.40 ±0.02  | 7.36±0.01   | 7.32±0.02   | 7.30 ±0.02  | - |
|                                     | D.O. (mg/L)           | 7.96±0.03   | 8.67±0.09   | 8.62±0.08   | 8.62±0.12   | 8.62±0.04   | - |
|                                     | Oxygen saturation (%) | 97.20±3.06  | 105.14±1.02 | 104.54±0.94 | 104.61±1.35 | 104.57±0.36 | - |
|                                     | NO <sub>2</sub> (µM)  | 0.29        | 0.29        | 0.29        | 0.29        | 0.29        | - |
|                                     | NO <sub>3</sub> (µM)  | 12.44       | 12.44       | 12.44       | 12.44       | 12.44       | - |
|                                     | NH <sub>4</sub> (µM)  | 0.92        | 0.92        | 0.92        | 0.92        | 0.92        | - |
| <b>Experiment<br/>end<br/>(old)</b> | Temperature (°C)      | 19.06±0.21  | 19.18±0.22  | 19.12±0.15  | 19.08±0.15  | 19.6±0.36   | - |
|                                     | Salinity (PSU)        | 16.34±0.10  | 16.34±0.17  | 16.45±0.08  | 16.42±0.07  | 16.38±0.25  | - |
|                                     | pH                    | 7.38±0.02   | 7.35±0.03   | 7.35±0.04   | 7.39±0.02   | 7.39±0.01   | - |
|                                     | D.O. (mg/L)           | 8.77±0.12   | 8.36±0.50   | 8.56±0.29   | 8.72±0.08   | 8.82±0.05   | - |
|                                     | Oxygen saturation (%) | 104.33±1.36 | 99.67±5.86  | 102.05±3.24 | 103.86±0.69 | 106.51±1.27 | - |
|                                     | NO <sub>2</sub> (µM)  | 0.29±0.02   | 0.27±0.02   | 0.27±0.00   | 0.28±0.01   | 0.23±0.12   | - |
|                                     | NO <sub>3</sub> (µM)  | 6.63±0.41   | 6.96±0.20   | 6.81±0.30   | 6.82±0.42   | 5.79±3.04   | - |
|                                     | NH <sub>4</sub> (µM)  | 6.91±0.68   | 8.66±1.15   | 9.40±0.68   | 10.36±0.41  | 6.21±3.80   | - |

**Table S3.** Equations for LC<sub>50</sub> calculation for the reference toxicant tests 1, 2 and 3 (LC<sub>50</sub> = 1.250, 1.739 mg/L, 1.409 mg/L).

| Parameter        |                                                                                        | Value |
|------------------|----------------------------------------------------------------------------------------|-------|
| LC <sub>50</sub> |                                                                                        | 1.25  |
| Equation         | $Y = -0.0981 + \frac{100.0916 + (-0.0981)}{1 + \left(\frac{X}{1.25}\right)^{-8.1493}}$ |       |
| Equation Form    | $Y = Min + \frac{Max - Min}{1 + \left(\frac{X}{LC50}\right)^{Hill\ coefficient}}$      |       |

| Parameter        | Value                                                                          |
|------------------|--------------------------------------------------------------------------------|
| LC <sub>50</sub> | 1.7392                                                                         |
| Equation         | $Y = -0.0091 + \frac{100.2008 + (-0.0091)}{1 + (\frac{X}{1.7392})^{-10.1878}}$ |
| Equation Form    | $Y = Min + \frac{Max - Min}{1 + (\frac{X}{LC50})^{Hill\ coefficient}}$         |

| Parameter        | Value                                                                          |
|------------------|--------------------------------------------------------------------------------|
| LC <sub>50</sub> | 1.4095                                                                         |
| Equation         | $Y = -0.0113 + \frac{100.0014 + (-0.0113)}{1 + (\frac{X}{1.4095})^{-13.6797}}$ |
| Equation Form    | $Y = Min + \frac{Max - Min}{1 + (\frac{X}{LC50})^{Hill\ coefficient}}$         |
